# Supplementary material
Source: PubMed Central journal article supplement (PMC4303047)
Supplement: NIHMS613400-supplement-01.pdf [file NIHMS613400-supplement-01.pdf]

Supplementary Table 1. Length of each session (in minutes) across treatment groups

|                                                  | FF            | TSB           | p value |
|--------------------------------------------------|---------------|---------------|---------|
|                                                  | M (SD)        | M (SD)        |         |
| Session 1 (includes 15 minute engagement module) | 89.73 (17.03) | 50.38 (15.79) | <.001   |
| Session 2                                        | 85.92 (24.40) | 39.26 (13.47) | <.001   |
| Session 3                                        | 66.00 (18.05) | 38.05 (9.44)  | <.001   |
| Session 4                                        | 80.93 (12.00) | 50.35 (12.89) | <.001   |
| Session 5 (includes 15 minute engagement module) | 85.08 (13.20) | 57.31 (13.29) | <.001   |
| Session 6                                        | 72.83 (15.24) | 43.53 (13.83) | <.001   |
| Session 7 (includes 15 minute engagement module) | 81.85 (12.25) | 47.89 (16.02) | <.001   |
| Session 8                                        | 68.08 (14.92) | 46.78 (14.87) | <.001   |
| Session 9                                        | 67.58 (13.70) | 37.65 (11.94) | <.001   |
| Session 10                                       | 61.50 (18.29) | 35.28 (15.66) | <.001   |

M = Mean; SD = Standard Deviation; FF = face to face; TSB = therapist-supported bibliotherapy.

Supplementary Table 2. Barriers to Treatment Participation Scale (BTPS) (means and standard deviations (1-5 point scale))

| BTPS Subscales                                        | All<br>M (SD) | FF<br>M (SD) | TSB<br>M (SD) | p<br>value |
|-------------------------------------------------------|---------------|--------------|---------------|------------|
| Stressors and Obstacles (that compete with treatment) | 1.57 (.42)    | 1.46 (.31)   | 1.69 (.49)    | .07        |
| Treatment Demands and Issues                          | 1.38 (.27)    | 1.37 (.27)   | 1.38 (.27)    | .91        |
| Perceived Relevance of Treatment                      | 1.18 (.29)    | 1.13 (.28)   | 1.23 (.31)    | .29        |
| Relationship with Therapist                           | 1.00 (.00)    | 1.00 (.00)   | 1.00 (.00)    | ---        |

FF = face to face; TSB = therapist-supported bibliotherapy.
